# Supplementary material for: SARS-CoV-2 nsp14 Exoribonuclease Removes the Natural Antiviral 3′-Deoxy-3′,4′-didehydro-cytidine Nucleotide from RNA
Source: MDPI journal article supplement (doi:10.3390/v14081790), 2022-08-16

## Figure S1. Purity of ddhCTP

ddhCTP was synthesized and purified as previously described (*J. Med. Chem.* **2021**, *64*, 15429-15439). The following spectral data are provided to demonstrate purity:

A.  $^{31}\text{P}$  NMR of the purified ddhCTP sample in  $\text{D}_2\text{O}$ .

B. Low resolution mass spectrum of the purified ddhCTP sample ( $\text{ESI}^+$ ,  $\text{M}+\text{H}^+$ ,  $\text{C}_9\text{H}_{15}\text{N}_3\text{O}_{13}\text{P}_3$ ; calculated: 465.98, found 466.0).

C. Analytical HPLC trace of purified ddhCTP sample at 260 nm. Purity: 96%.

**A**

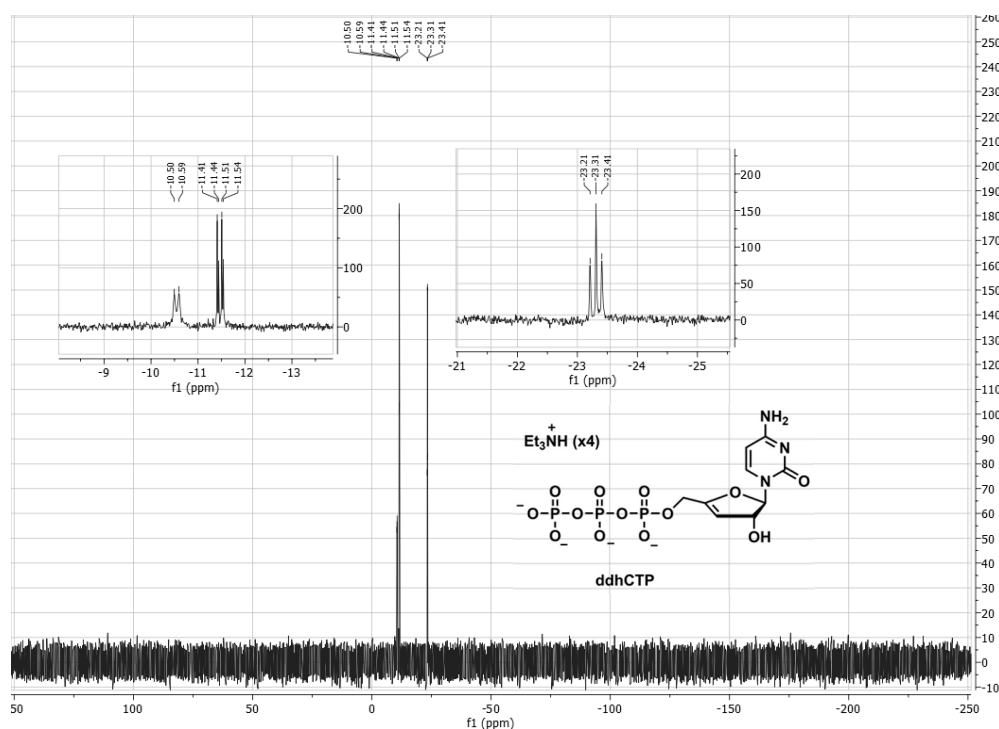

**B**

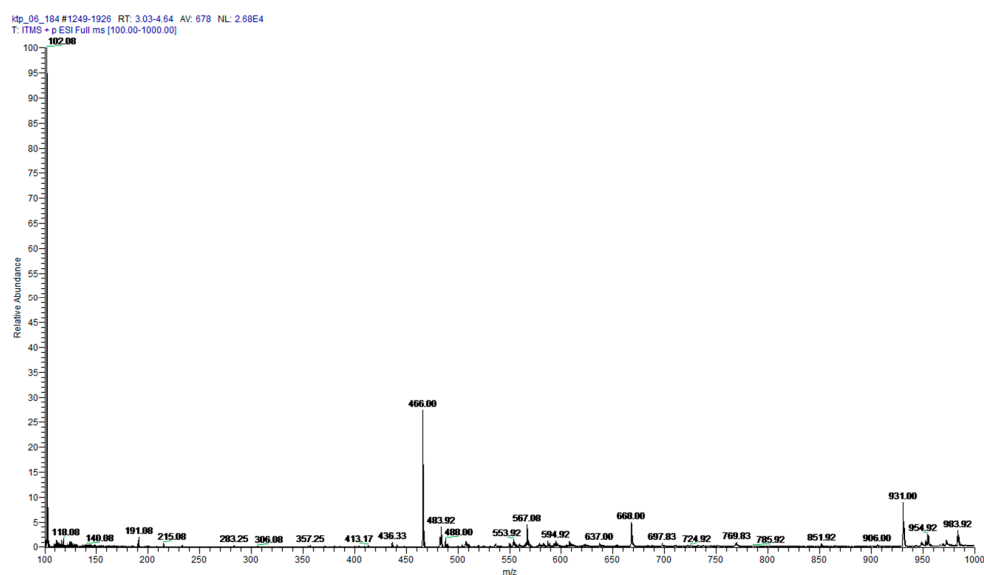

C

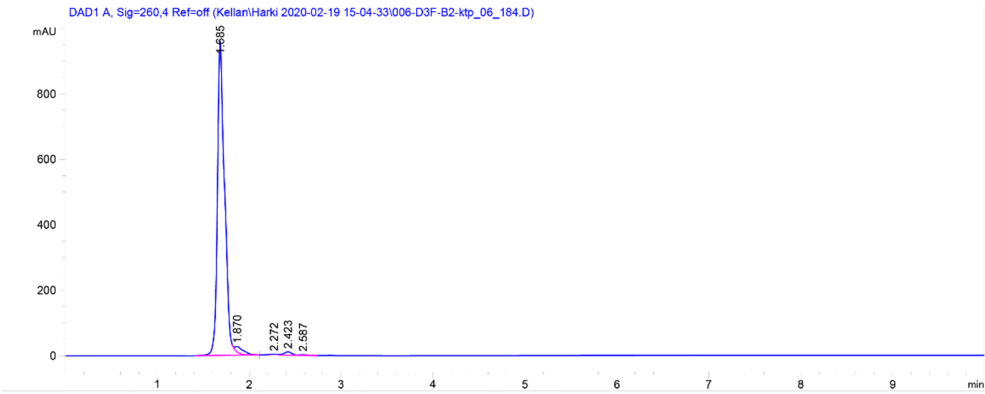

Supplement: s1 [file s1]
