# Supplementary material for: SARS-CoV-2 nsp14 Exoribonuclease Removes the Natural Antiviral 3′-Deoxy-3′,4′-didehydro-cytidine Nucleotide from RNA
Source: MDPI journal article supplement (doi:10.3390/v14081790), 2022-08-16

**Figure S2.** Representative spectrograms showing band intensities for the gel result in Figure 3b and 3c

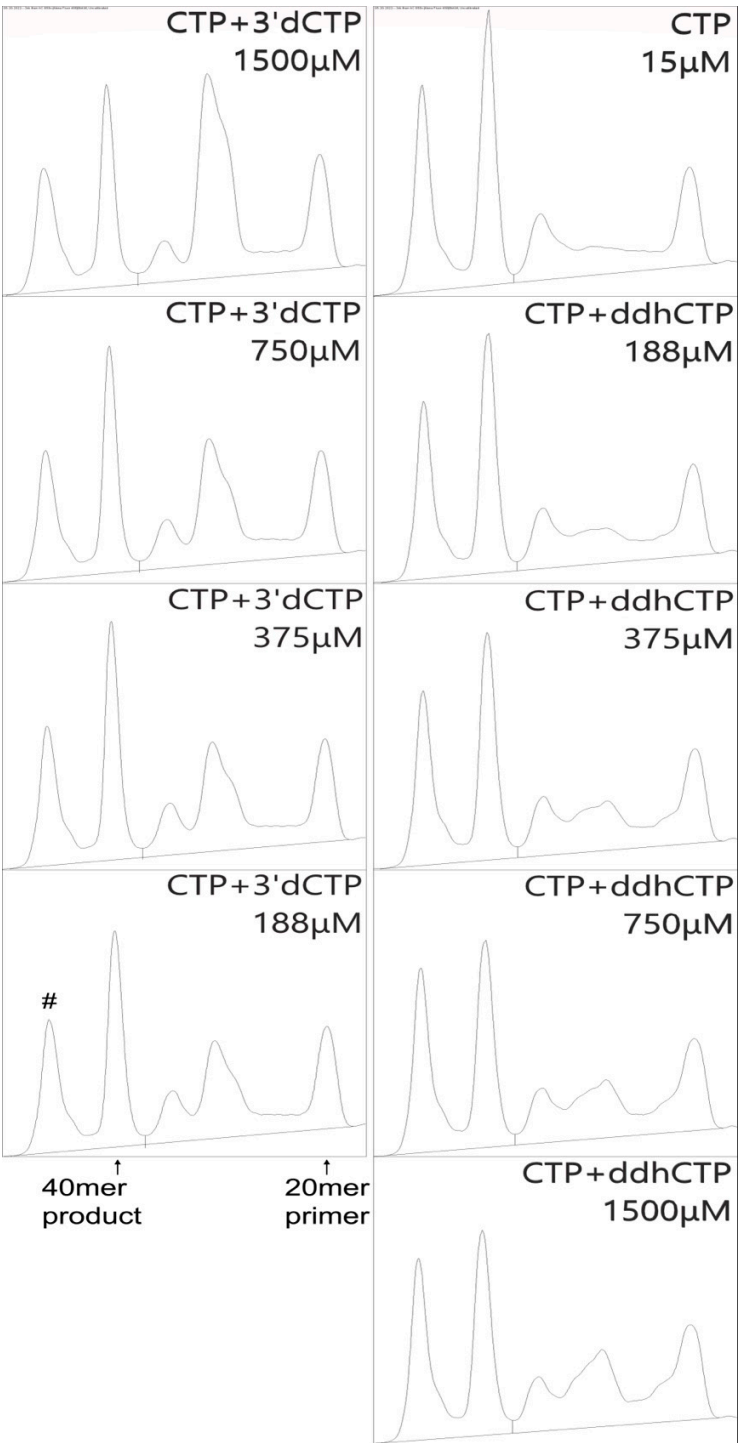

Supplement: s1 [file s1]
